# Supplementary material for: Locally ordered junctions govern diffusion in triglycerides: insights from molecular dynamics simulations
Source: Royal Society of Chemistry journal article supplement (doi:10.1039/d5ra07973j), 2025-01-01
Supplement: d5ra07973j1.pdf [file d5ra07973j1.pdf]

## Supporting Information for

# **Locally Ordered Junctions Govern Diffusion in Triglycerides: Insights from Molecular Dynamics Simulations**

Yuki Kitamura<sup>a</sup>, Yusuke Yasuda<sup>b</sup>, Junya Metoki<sup>c</sup>, Shogo Tsujino<sup>c</sup>, Kazuma Yoshimura<sup>d</sup>, Takahide Watanabe<sup>c</sup>, and  
Kazushi Fujimoto<sup>a,b,e,\*</sup>

a) Graduate School of Science and Engineering, Kansai University, 3-3-35 Yamate-cho, Suita, Osaka 564-8680,  
Japan

b) Organization for Research and Development of Innovative Science and Technology, Kansai University, 3-3-35  
Yamate-cho, Suita, Osaka 564-8680, Japan

c) Technical Division, The Nisshin OilliO Group, Ltd., 1 Shinmori-cho, Isogo-ku, Yokohama 235-8558, Japan.

d) Household-Use & Wellness Foods Business Strategy, The Nisshin OilliO Group, Ltd., 1 Shinmori-cho, Isogo-ku,  
Yokohama 235-8558, Japan.

e) Department of Chemistry and Materials Engineering, Faculty of Chemistry, Materials and Bioengineering,  
Kansai University, 3-3-35 Yamate-cho, Suita, Osaka 564-8680, Japan

\*Corresponding author. E-mail address: k-fuji@kansai-u.ac.jp

## S1 Supporting graph

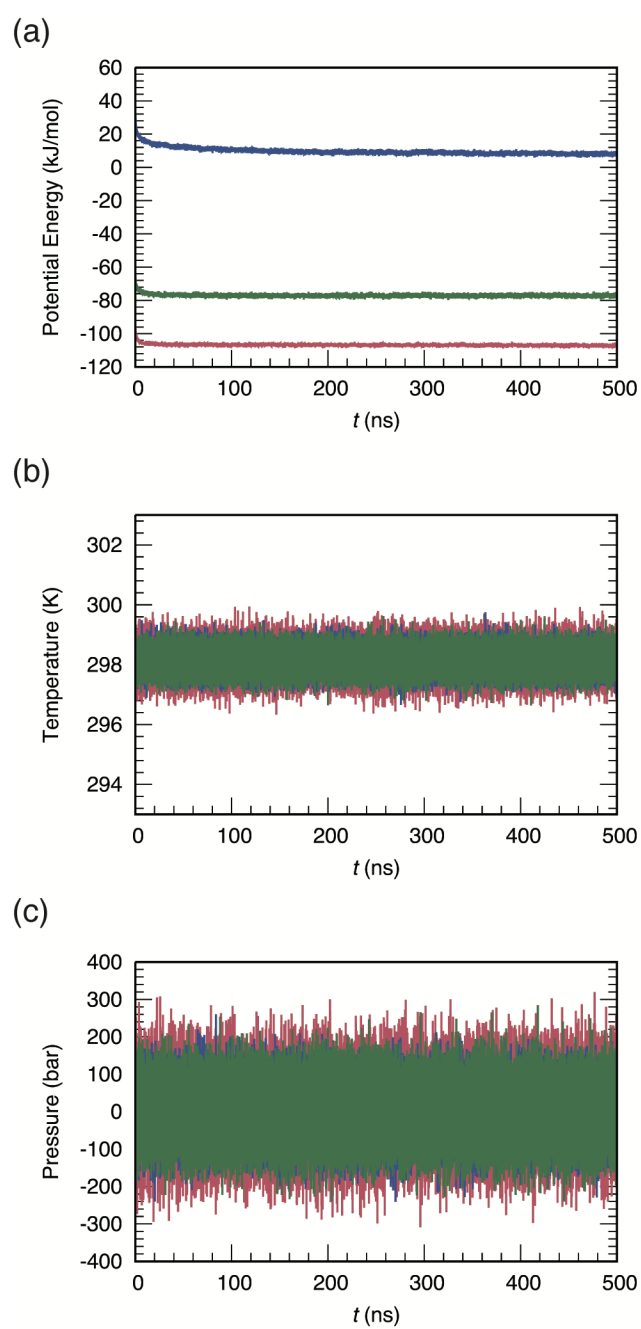

Figure S1. Potential energy, temperature, and pressure as functions of time for 8:0 (red), 18:1 (blue), and 18:3 (green).
